# Supplementary material for: SARS-CoV-2 Secondary Attack Rates in Vaccinated and Unvaccinated Household Contacts during Replacement of Delta with Omicron Variant, Spain
Source: PubMed Central journal article supplement (PMC9514368; doi:10.3201/eid2810.220494), 2022-10
Supplement: 22-0494-Techapp-s1.pdf [file 22-0494-Techapp-s1.pdf]

# SARS-CoV-2 Secondary Attack Rates in Vaccinated and Unvaccinated Household Contacts during Replacement of Delta with Omicron Variant, Spain

## Appendix

**Appendix Table.** Characteristics of participants in a study of SARS-CoV-2 secondary attack rates in vaccinated and unvaccinated household contacts during replacement of Delta with Omicron variant, Spain\*

| Variables†                | No. participants | Delta-dominant period |                  | p value | Omicron-dominant period |                  | p value |
|---------------------------|------------------|-----------------------|------------------|---------|-------------------------|------------------|---------|
|                           |                  | Index cases           | Contacts         |         | Index cases             | Contacts         |         |
| Total                     | 693              | 123                   | 251              |         | 104                     | 215              |         |
| Age group, y              | 38.0 (15.0–49.5) | 43.0 (25.0–55.0)      | 37.0 (11.0–49.0) | 0.003   | 39.0 (19.3–48.0)        | 31.0 (15.0–48.0) | 0.1     |
| 0–12                      | 147 (21.3)       | 18 (14.6)             | 70 (28.4)        |         | 17 (16.4)               | 42 (19.5)        |         |
| 13–18                     | 54 (7.8)         | 3 (2.4)               | 18 (7.3)         |         | 6 (5.8)                 | 27 (12.6)        |         |
| 19–35                     | 123 (17.9)       | 22 (17.9)             | 32 (13.0)        | 0.007   | 22 (21.2)               | 47 (21.9)        | 0.2‡    |
| 36–45                     | 148 (21.5)       | 30 (24.4)             | 46 (18.6)        |         | 30 (28.9)               | 42 (19.5)        |         |
| >45                       | 217 (31.5)       | 50 (40.7)             | 81 (32.8)        |         | 29 (27.9)               | 57 (26.5)        |         |
| Missing data§             | 4 (0.6)          | —                     | 4 (1.6)          |         | —                       | —                |         |
| Sex                       |                  |                       |                  |         |                         |                  |         |
| M                         | 346 (49.9)       | 58 (47.1)             | 133 (52.8)       | 0.3     | 40 (38.5)               | 115 (53.5)       | 0.01    |
| F                         | 347 (50.1)       | 65 (52.9)             | 118 (47.2)       |         | 64 (61.5)               | 100 (46.5)       |         |
| Missing data              | 1 (0.1)          | —                     | 1 (0.4)          |         | —                       | —                |         |
| Median no. housemates     | 2 (2–3)          | 2 (1–3)               | —                | —       | 2 (2–3)                 | —                | —       |
| Vaccination status        |                  |                       |                  |         |                         |                  |         |
| Vaccinated (all vaccines) | 511 (73.7)       | 91 (74.0)             | 167 (66.5)       | 0.1     | 83 (79.8)               | 170 (79.1)       | 0.9     |
| AstraZeneca vaccine       | 66 (12.9)        | 18 (19.8)             | 22 (13.2)        | 0.2     | 11 (13.3)               | 15 (8.8)         | 0.3     |
| Janssen vaccine           | 20 (3.9)         | 4 (4.4)               | 5 (3.0)          | 0.7     | 3 (3.6)                 | 8 (4.7)          | 0.7     |
| Moderna vaccine           | 102 (20.0)       | 7 (7.7)               | 14 (8.4)         | 0.8     | 26 (31.3)               | 55 (32.4)        | 0.9     |
| Pfizer vaccine            | 367 (71.8)       | 63 (69.2)             | 127 (76.1)       | 0.2     | 54 (65.1)               | 123 (72.4)       | 0.2     |
| Number of doses           |                  |                       |                  |         |                         |                  |         |
| 1 dose¶                   | 63 (12.4)        | 9 (9.9)               | 17 (10.2)        | 0.9     | 8 (9.6)                 | 29 (17.2)        | 0.1     |
| 2 doses#                  | 401 (78.6)       | 77 (84.6)             | 146 (87.4)       | 0.5     | 65 (78.3)               | 113 (66.9)       | 0.06    |
| 3 doses††                 | 46 (9.0)         | 5 (5.5)               | 4 (2.4)          | 0.2     | 10 (12.1)               | 27 (16.0)        | 0.4     |
| Missing data              | 1 (0.2)          | —                     | —                |         | —                       | 1 (0.6)          |         |

| Variables†                          | No. participants | Delta-dominant period |                  |         | Omicron-dominant period |                  |         |
|-------------------------------------|------------------|-----------------------|------------------|---------|-------------------------|------------------|---------|
|                                     |                  | Index cases           | Contacts         | p value | Index cases             | Contacts         | p value |
| Median no. wk from last dose        | 20.4 (14.3–25.0) | 22.9 (16.8–27.0)      | 25.1 (10.8–25.7) | 0.07    | 20.1 (15.1–24.4)        | 20.0 (14.3–23.9) | 0.5     |
| Symptomatic                         | 225 (51.4)       | —                     | 109 (46.4)       | —       | —                       | 116 (57.1)       | —       |
| Missing data                        | 28 (4.0)         | —                     | 16 (6.4)         | —       | —                       | 12 (5.6)         | —       |
| Previous infection                  | 38 (7.8)         | 0                     | 9 (3.6)          | 0.06    | 12 (11.5)               | 17 (7.9)         | 0.3     |
| Missing data                        | 208 (30.0)       | 71 (57.7)             | 129 (51.4)       | —       | 1 (1.0)                 | 7 (3.3)          | —       |
| SARS-CoV-2 infection among contacts | 320 (68.7)       | —                     | 146 (58.2)       | —       | —                       | 174 (80.9)       | —       |

\*AstraZeneca, <https://www.astrazeneca.com>; Janssen, <https://www.jnj.com>; Moderna, <https://www.modernatx.com>; Pfizer-BioNTech, <https://www.pfizer.com>.

†Values are median (interquartile range) or no. (%).

‡p value for trend.

§Patients with missing data were not included in analysis.

¶AstraZeneca, 4/63 (6.4%); Janssen, 15/63 (23.8%); Moderna, 11/63 (17.5%); Pfizer, 33/63 (52.4%).

#AstraZeneca ×2, 49/401 (12.2%); AstraZeneca + Pfizer, 4/401 (1.0%); Janssen + Moderna, 5/401 (1.3%); Moderna ×2, 48/401 (12.0%); Pfizer ×2, 295/401 (73.6%).

††AstraZeneca ×2 + Moderna, 8/46 (17.4%); AstraZeneca ×2 + Pfizer, 1/46 (2.2%); Moderna ×3, 3/46 (6.5%); Pfizer ×2 + Moderna, 27/46 (58.7%); Pfizer ×3, 7/46 (15.2%).

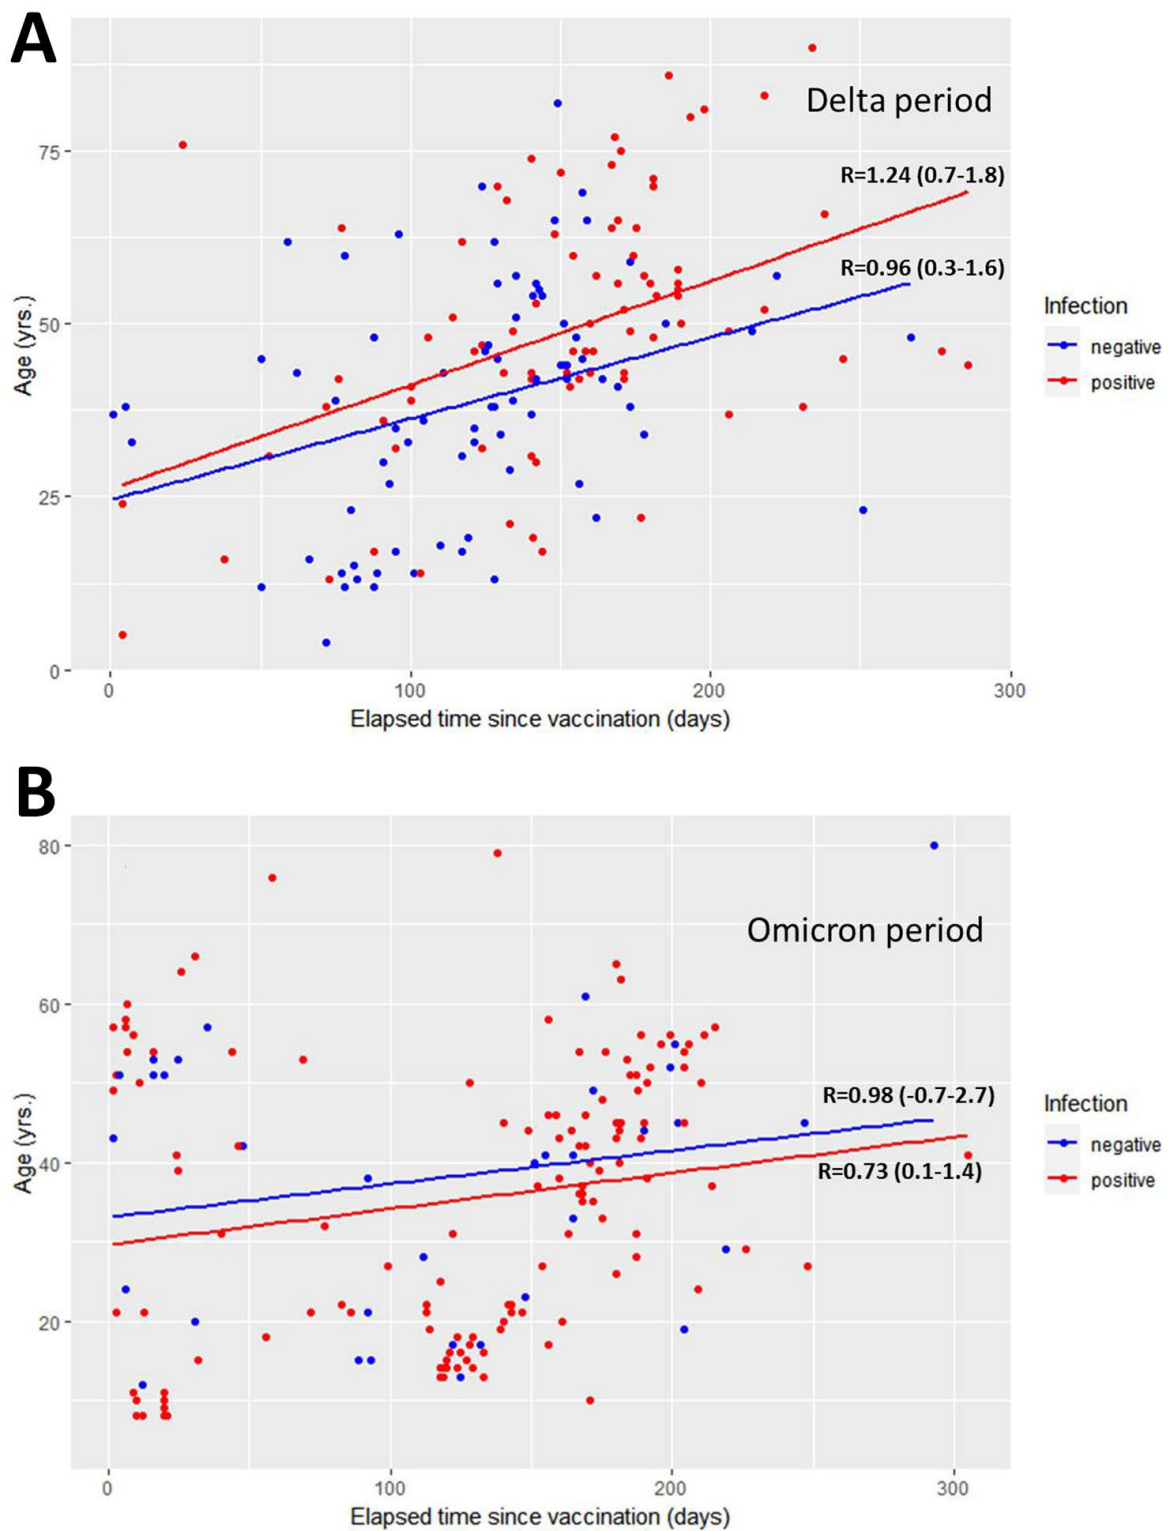

**Appendix Figure 1.** Effects of age on infection risk in a study of SARS-CoV-2 secondary attack rates in vaccinated and unvaccinated household contacts during replacement of Delta with Omicron variant, Spain. To visualize the effect of age on infection risk, we conducted linear regression analysis of age against time elapsed since the last vaccination during the A) Delta-dominant period and B) Omicron-dominant period after stratifying data by contact infection status. No significant differences were observed between infected and uninfected contacts in either period. R, regression coefficient (CI).

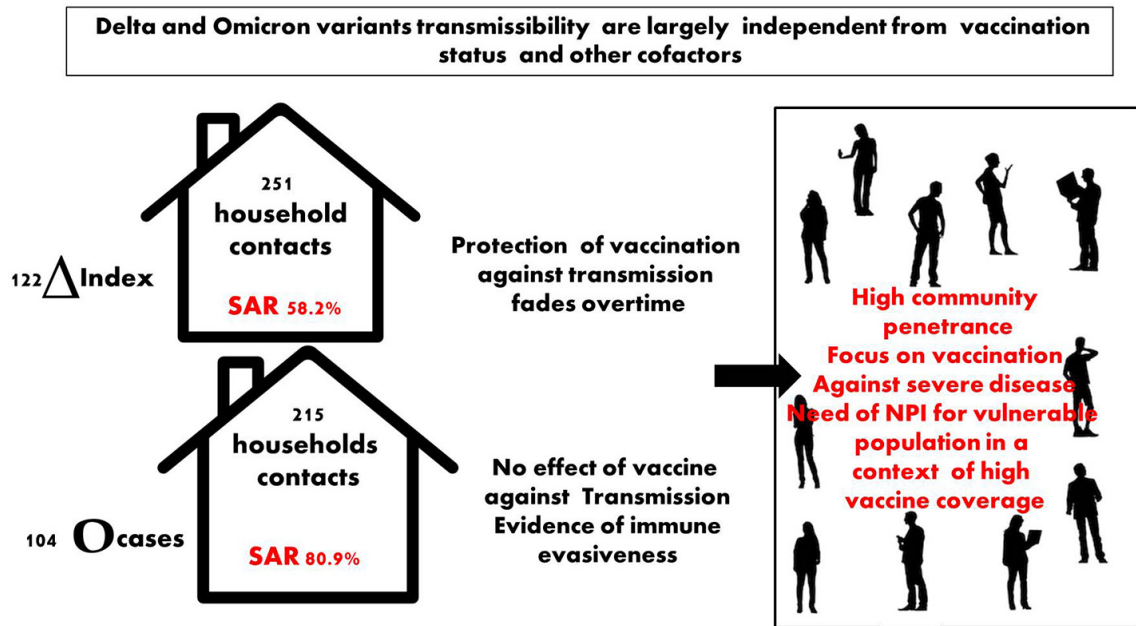

**Appendix Figure 2.** Graphical abstract showing SARS-CoV-2 secondary attack rates in vaccinated and unvaccinated household contacts during replacement of Delta with Omicron variant, Spain. Index case-patients were those who first showed clinical symptoms of infection in a specific household and sought diagnosis or treatment at a primary healthcare center. Contacts were defined as persons who had spent more than 15 min with the index case-patient in an indoor space without intervention measures, such as masks, during the 48 h before COVID-19 diagnosis was confirmed for the index case-patient. Vaccination had a greater protective effect against SARS-CoV-2 infection in the Delta-dominant period than Omicron period. However, protection diminished over time. In the Omicron-dominant period, vaccination had little protective effect for contacts, which was, in part, likely because of immune evasion. NPI, nonpharmaceutical intervention; SAR, secondary attack rate.
